# Supplementary material for: Hospital Staff’s Attitudes Toward and Knowledge About Dementia Before and After a Two-Day Dementia Training Program
Source: PubMed Central journal article supplement — J Alzheimers Dis. 2020 Sep 1;77(1):355–65. doi: 10.3233/JAD-200268 (PMC7592687; doi:10.3233/jad-200268), 2020-09-01
Supplement: jad-77-jad200268-s001.pdf [file jad-77-jad200268-s001.pdf]

# Supplementary Material

## Hospital Staff's Attitudes Toward and Knowledge About Dementia Before and After a Two-Day Dementia Training Program

**Supplementary Table 1.** Mixed-effect models for the DAS-D subscale “social comfort” with time-effect and covariates.

|                                      | Model 1: Time-effect |           |           |               |      | Model 2: Time-effect and covariates |           |           |               |       |
|--------------------------------------|----------------------|-----------|-----------|---------------|------|-------------------------------------|-----------|-----------|---------------|-------|
|                                      | <i>b</i>             | <i>SE</i> | <i>p</i>  | 95% <i>CI</i> |      | <i>b</i>                            | <i>SE</i> | <i>p</i>  | 95% <i>CI</i> |       |
|                                      |                      |           |           | Low           | High |                                     |           |           | Low           | High  |
| Intercept                            | 4.80                 | 0.10      | <0.001*** | 4.60          | 5.01 | 5.00                                | 0.43      | <0.001*** | 4.15          | 5.86  |
| Time                                 |                      |           |           |               |      |                                     |           |           |               |       |
| T0 <sup>b</sup> versus T1            | 0.24                 | 0.09      | 0.008**   | 0.06          | 0.41 | 0.24                                | 0.10      | 0.016*    | 0.05          | 0.43  |
| T0 <sup>b</sup> versus T2            | 0.26                 | 0.09      | 0.003**   | 0.09          | 0.44 | 0.29                                | 0.09      | 0.002**   | 0.11          | 0.48  |
| Work experience (y)                  | .                    | .         | .         | .             | .    | -0.02                               | 0.01      | 0.036*    | -0.05         | -0.00 |
| Interest to participate <sup>a</sup> | .                    | .         | .         | .             | .    | 0.05                                | 0.04      | 0.243     | -0.03         | 0.13  |
| Years of school                      |                      |           |           |               |      |                                     |           |           |               |       |
| 9 <sup>b</sup> versus 10 y           | .                    | .         | .         | .             | .    | -0.30                               | 0.29      | 0.298     | -0.88         | 0.27  |
| 9 <sup>b</sup> versus 12 y           | .                    | .         | .         | .             | .    | -0.11                               | 0.32      | 0.742     | -0.74         | 0.53  |

<sup>a</sup>Question: Please rate your interest in the training “People with dementia in the hospital”. Rated on a scale from 0 (not interested at all) to 10 (very high interest).  
<sup>b</sup>Reference group  
 \**p* < 0.05, \*\**p* < 0.01, \*\*\**p* < 0.001

**Supplementary Table 2.** Multilevel models for the DAS-D subscale “dementia knowledge” with time-effect and covariates.

|                                      | Model 1: Time-effect |           |           |               |      | Model 2: Time-effect and covariates |           |           |               |      |
|--------------------------------------|----------------------|-----------|-----------|---------------|------|-------------------------------------|-----------|-----------|---------------|------|
|                                      | <i>b</i>             | <i>SE</i> | <i>p</i>  | 95% <i>CI</i> |      | <i>b</i>                            | <i>SE</i> | <i>p</i>  | 95% <i>CI</i> |      |
|                                      |                      |           |           | Low           | High |                                     |           |           | Low           | High |
| Intercept                            | 5.51                 | 0.08      | <0.001*** | 5.34          | 5.67 | 5.15                                | 0.28      | <0.001*** | 4.60          | 5.70 |
| Time                                 |                      |           |           |               |      |                                     |           |           |               |      |
| T0 <sup>b</sup> versus T1            | 0.16                 | 0.08      | 0.054     | 0.00          | 0.32 | 0.14                                | 0.08      | 0.107     | -0.03         | 0.31 |
| T0 <sup>b</sup> versus T2            | 0.27                 | 0.08      | 0.001**   | 0.11          | 0.43 | 0.21                                | 0.08      | 0.009**   | 0.05          | 0.36 |
| Work experience (y)                  | .                    | .         | .         | .             | .    | -0.01                               | 0.01      | 0.099     | -0.02         | 0.00 |
| Interest to participate <sup>a</sup> | .                    | .         | .         | .             | .    | 0.06                                | 0.03      | 0.018*    | 0.01          | 0.11 |
| Years of school                      |                      |           |           |               |      |                                     |           |           |               |      |
| 9 <sup>b</sup> versus 10 y           | .                    | .         | .         | .             | .    | 0.03                                | 0.18      | 0.860     | -0.34         | 0.40 |
| 9 <sup>b</sup> versus 12 y           | .                    | .         | .         | .             | .    | 0.49                                | 0.20      | 0.019*    | 0.08          | 0.89 |

<sup>a</sup>Question: Please rate your interest in the training “People with dementia in the hospital”. Rated on a scale from 0 (not interested at all) to 10 (very high interest).

<sup>b</sup>Reference group

\**p* < 0.05, \*\**p* < 0.01, \*\*\**p* < 0.001

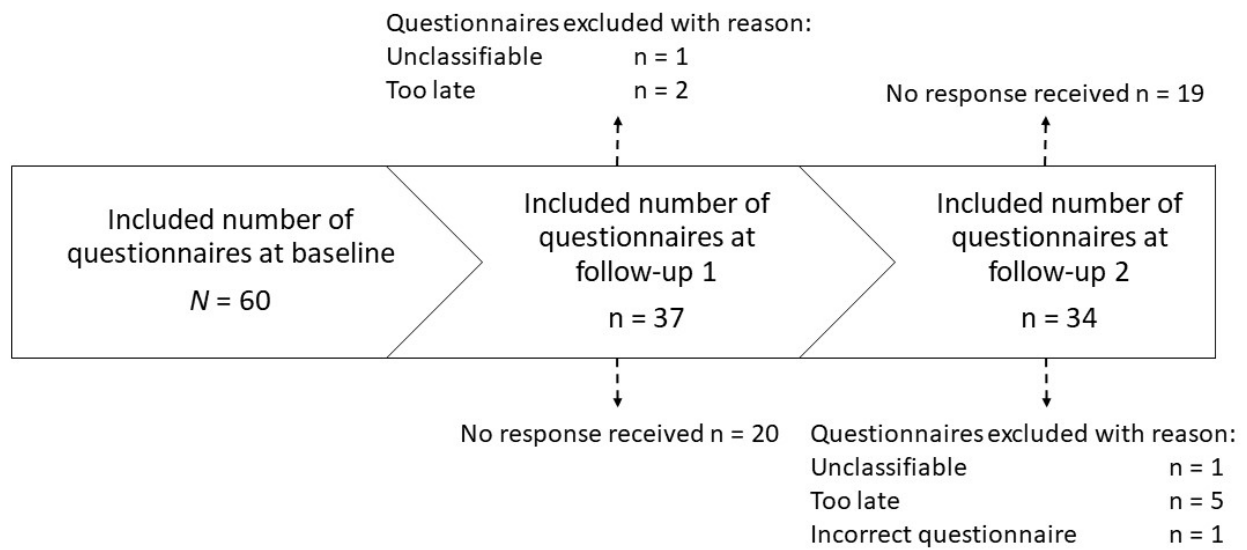

**Supplementary Figure 1.** Flow diagram of included questionnaires at each stage of the study.

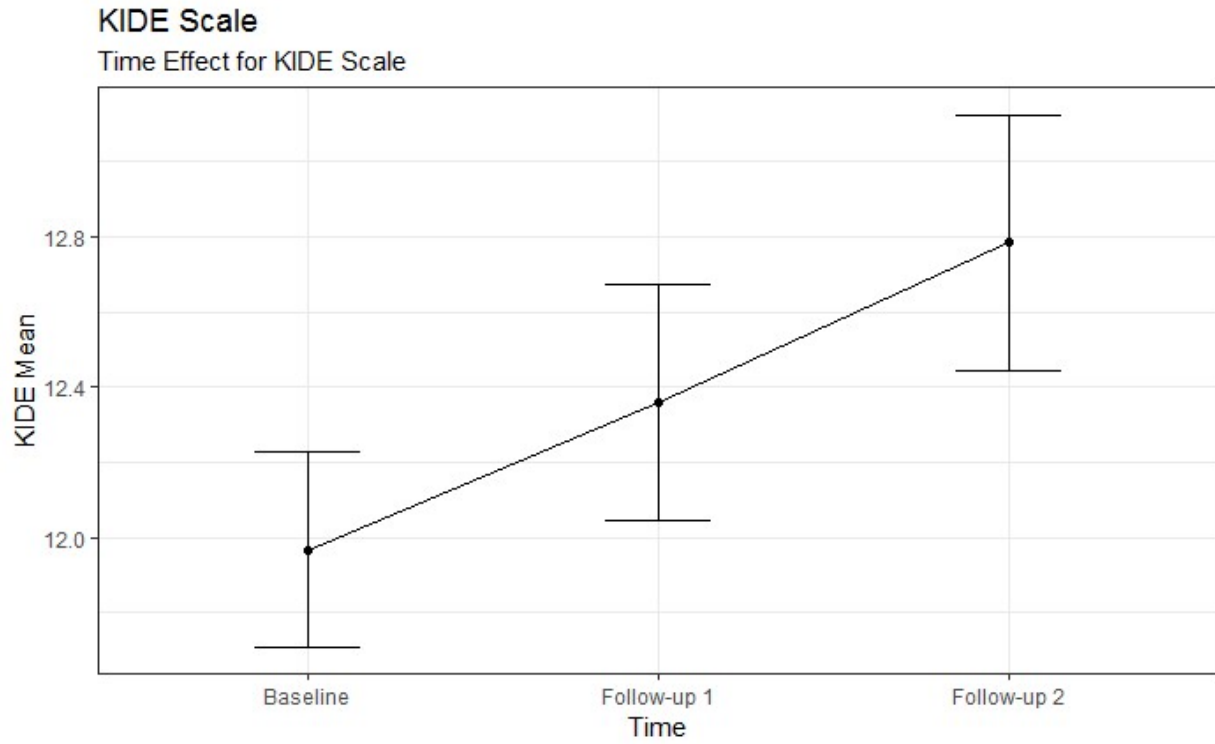

**Supplementary Figure 2.** Overall time-effect of the KIDE scale with a theoretical range from 0 to 16. Whiskers represent standard errors.
